# Supplementary material for: A New Strategy for the Synthesis of Fluorinated Polyurethane
Source: MDPI journal article supplement (doi:10.3390/polym11091440), 2019-09-02
Supplement: s1 [file s1]

# A New Strategy for the Synthesis of Fluorinated Polyurethane

*Pu-Cheng Wang,<sup>a</sup> Dan Lu,<sup>b</sup> Hu Wang<sup>b</sup> and Ru-Ke Bai<sup>b,\*</sup>*

<sup>a</sup> Institute of Nuclear Physics and Chemistry, China Academy of Engineering Physics, Mianyang 621000, China.

<sup>b</sup> CAS Key Laboratory of Soft Matter Chemistry, Department of Polymer Science and Engineering, University of Science and Technology of China, Hefei 230026, China.

## 1. Synthesis of S-benzyl O-ethyl dithiocarbonate (BEDTC)

BEDTC was synthesized according to a previous report.<sup>1</sup> The synthesis was conducted by stirring 40 mL ethanol and 5.6 g KOH (0.10 mol) until a clear solution was formed. Then, 20 mL CS<sub>2</sub> (0.33 mol) was slowly added into the solution, and the mixture was stirred for 10 h at room temperature before excess CS<sub>2</sub> was distilled off at 70 °C. Then, 10 mL benzyl chloride (0.087 mol) in 20 mL of ethanol was added to the residual solution, and the mixture was further stirred at 60 °C for 5 h. After removal of the inorganic salt and most of the ethanol, 50 mL water was added, and the solution was extracted with diethyl ether (3×40 mL). The combined organic layer was dried over anhydrous Na<sub>2</sub>SO<sub>4</sub>. Removal of the inorganic salt and evaporation of the solvent afforded a yellow oil product: 12.1 g, 65.8%. <sup>1</sup>H and <sup>13</sup>C NMR spectra are shown in Figure S1 and Figure S2, respectively.

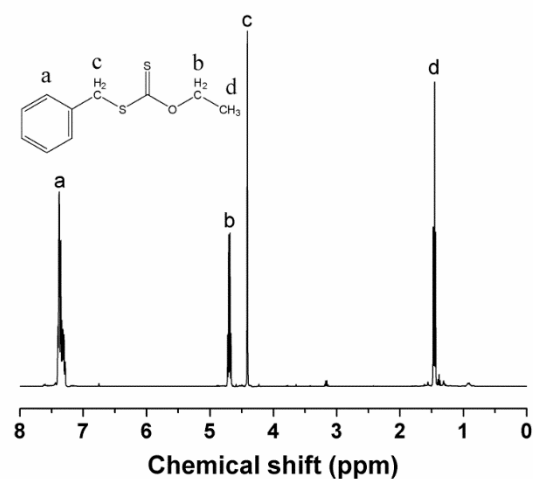

**Figure S1.**  $^1\text{H}$  NMR spectrum of BEDTC recorded in  $\text{CDCl}_3$  at room temperature.

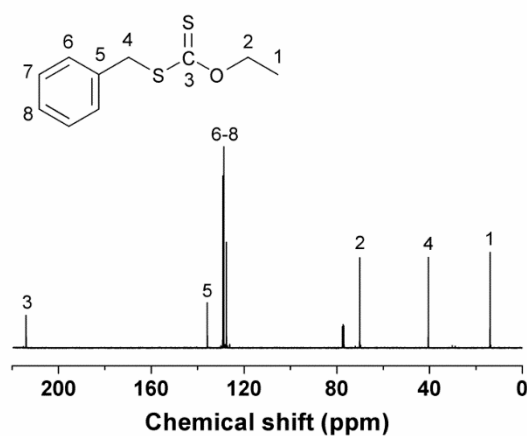

**Figure S2.**  $^{13}\text{C}$  NMR spectrum of BEDTC recorded in  $\text{CDCl}_3$  at room temperature.

## 2. Chemical shifts of the copolymers in $^1\text{H}$ NMR spectra

Poly(CTFE-alt-BVE) ( $\delta$ =ppm): 4.52 (m, 1H), 3.73 (m, 2H), 2.75 (m, 2H), 1.59 (m, 2H), 1.40 (m, 2H), 0.89 (m, 3H).

Poly(CTFE-alt-BVE)-*b*-PVAc ( $\delta$ =ppm): 4.81 (m, 1H), 4.50 (m, 1H), 3.71 (m, 2H),

2.74 (m, 2H), 1.99 (s, 3H), 1.75 (m, 2H), 1.55 (m, 2H), 1.38 (m, 2H), 0.85 (m, 3H).

Poly(CTFE-alt-BVE)-*b*-PVA ( $\delta$ =ppm): 4.46 (m, 1H), 3.92 (m, 1H), 3.70 (m, 2H),  
2.72 (m, 2H), 1.52 (m, 2H), 1.40 (m, 2H), 1.35 (m, 2H), 0.84 (m, 3H).
